# Supplementary material for: The SARS-CoV-2 protein ORF3c is a mitochondrial modulator of innate immunity
Source: bioRxiv or medRxiv preprint supplement (doi:10.1101/2022.11.15.516323), 2022-11-18
Supplement: Supplementary file [file media-1.pdf]

(A)

|    |                                           |           |                                                                          |
|----|-------------------------------------------|-----------|--------------------------------------------------------------------------|
| 14 | MLLLQVLFMLLQRYRYKPHSLSDGLLLVLHCFLLSRALP   | OL674078  | <i>Rhinolophus stheno, R. malayanus, R. affinis</i>                      |
| 1  | MILLQILFALQOKYRYKPHSLSDGLLLVLFHLLFFRALPKS | LC663959  | <i>Rhinolophus cornutus</i>                                              |
| 1  | MILLQILFALQOKYRYKPHSLSDGLLLVLFHLLFFKALPKL | LC556375  | <i>Rhinolophus cornutus</i>                                              |
| 2  | MILLQILFALQOKYRYKPHSLSDGLLLVLFHLLFFKALPKS | LC663793  | <i>Rhinolophus cornutus</i>                                              |
| 1  | VLLLQILFALLQYRYKPHSLSDGLLLALQFLLFFKALQK   | MG772933  | <i>Rhinolophus pusillus</i>                                              |
| 1  | MLLLQILFALLQYRYKPHSLSDGLLLALQFLLFFKALQK   | OK017805  | <i>Rhinolophus pusillus</i>                                              |
| 5  | MLLLQILFALLQYRYKPHSLSDGLLLALQFLLFFKALQK   | MW703458  | <i>Rhinolophus pusillus, R. blythi,</i>                                  |
| 11 | MLLLQVLFMLLQRYHYKPHSLSDGLLLALHFLFFKALLK   | DQ022305  | <i>Rhinolophus sp.</i>                                                   |
| 1  | MLLLQVLFMLLQRYHYKPHSLSDGLLLALHFLFFKALPQ   | OK017792  | <i>Rhinolophus affinis</i>                                               |
| 1  | MLLLQVLFMLLQRYHYKPHSLSDGLLLALHFLFFKALPK   | OK017838  | <i>Rhinolophus sinicus</i>                                               |
| 1  | MLLLQILFALLQRYRYKPHSLSDGLLLALHFLFFKALPRS  | MN996532  | <i>Rhinolophus affinis</i>                                               |
| 1  | MLLLQILFALLQRYRYKPHSLSDGLLLALHSLFFKALPKS  | OK287355  | <i>Rhinolophus blythi</i>                                                |
| 1  | MLLLQILFALLQRYRYKPHSLSDGLLLALHFLFFKALPK   | MT121216  | <i>Manis javanica</i>                                                    |
| 4  | MLLLQILFALLQRYRYKPHSLSDGLLLALHFLFFKALPKS  | MZ937003  | <i>Rhinolophus malayanus, R. pusillus, R. marshalli</i>                  |
| 1  | MLLLQILFALLQRYRYKPHSLSDGLLLALHFLFFFTALPK  | MT040333  | <i>Manis javanica</i>                                                    |
| 5  | MLLLQILFALLQRYRYKPHSLSDGLLLALHFLFFSRALPKL | MW251308  | <i>Rhinolophus acuminatus</i>                                            |
| 1  | MLLLQILFALPQRYRYKPHSLSDGLLLALHFLFFRALPKS  | MZ937000  | <i>Rhinolophus malayanus</i>                                             |
| 1  | MLLLQILFALLQRYRYKPHSLSDGLLLALHFLFFRALPKS  | NC_045512 | <i>Homo sapiens (SARS-CoV-2)</i>                                         |
| 1  | MLLLQILFALLQRYRYKPHSLSDGLLLALHFLFFRALPKL  | MZ081381  | <i>Rhinolophus pusillus</i>                                              |
| 6  | MLLLQILFALLQRYRYKPHSLSDGLLLALHFLFFRALPK   | MT040335  | <i>Manis javanica</i>                                                    |
| 1  | MFLQVLFMLLQRYRYKPHSLSDGLLLALHFLFFKALPN    | MZ081382  | <i>Rhinolophus stheno</i>                                                |
| 1  | MLLLQVLFMLLQRYRYKPHSPSDGLLLALHFLFFKALPK   | MZ328294  | <i>Rhinolophus sinicus</i>                                               |
| 1  | MLLLQILFMLLQRYRYKPHSPSDGLLLALHFLFFKALPK   | OK017860  | <i>Rhinolophus siamensis</i>                                             |
| 1  | MLLLQVLFMLLQRYRYKPHSPDGLLLALHFLFFKALPK    | OK017812  | <i>Rhinolophus sinicus</i>                                               |
| 1  | MLLLQVLFMLLQRYRYKPHSLDGLLLALHFLFFRALPK    | KY417143  | <i>Rhinolophus sinicus</i>                                               |
| 1  | MLLLQVLFMLLQRYRYKPHSLDGLLLALHFLFFKALPK    | OK017859  | <i>Rhinolophus siamensis</i>                                             |
| 1  | MLLLQVLFMLLQRYRYKPHSLDGLLLALHFLFFKALPK    | MZ081377  | <i>Rhinolophus malayanus</i>                                             |
| 1  | MLLLQVLFMLLQRYRYKPHSPDGLLLALHFLFFKALPK    | OK017843  | <i>Rhinolophus sinicus</i>                                               |
| 15 | MLLLQVLFMLLQRYRYKPHSPSDGLLLALHFLFFKALPK   | MW681002  | <i>Rhinolophus sinicus, R. affinis</i>                                   |
| 1  | MLLLQVLFMLLQRYRYKPHSPSDGLLLALHFLFFKALPK   | FJ588690  | <i>Rhinolophus sinicus</i>                                               |
| 1  | MLLLQVLFMLLQRYRYKPHSPSDGLLLALHFLFFKALPK   | OK017823  | <i>Rhinolophus sinicus</i>                                               |
| 8  | MLLLQVLFMLLQRYRYKPHSPSDGLLLALHFLFFKALPK   | OK017801  | <i>Rhinolophus sinicus, R. affinis</i>                                   |
| 3  | MLLLQVLFMLLQRYRYKPHSLSDGLLLALHFLFFKALPR   | DQ071615  | <i>Rhinolophus sinicus</i>                                               |
| 1  | MLLLQVLFMLLQRYRYKPHSLSDGLLLALHFLFFKALPR   | OK017830  | <i>Rhinolophus sinicus</i>                                               |
| 1  | MLLLQVLFMLLQRYRYKPHSHSDGLLLALHFLFFKALPK   | JX993987  | <i>Rhinolophus pusillus</i>                                              |
| 6  | MLLLQVLFMLLQRYRYKPHSLSDGLLLALHFLFFKALPK   | DQ412043  | <i>Rhinolophus sinicus, R. macrotis</i>                                  |
| 1  | MLLLQVLFMLLQRYRYKPHSLSDGLLLALHFLFFRALPK   | KY417148  | <i>Rhinolophus sinicus</i>                                               |
| 1  | MLLLQVLFMLLQRYRYKPHSPSDGLLLALHFLFFRALPK   | AY304492  |                                                                          |
| 15 | MLLMQVLFVLLQRYRYKPHSLSDGLLLALHFLFFRALPK   | AY545917  | <i>Paguma larvata, Melogale moschata</i>                                 |
| 2  | MLLLQVLFVLLQRYRYKPHSLSDGLLLALHFLFFRALPK   | AY545916  | <i>Paguma larvata</i>                                                    |
| 8  | MLLLQVLFMLLQRYRYKPHSLSDGLLLALHFLFFRALPK   | MK211376  | <i>Rhinolophus sinicus, R. affinis</i>                                   |
| 1  | MLLLQVLFMLLQRYRYKPHSLSDGLLLALHFLFFRALPK   | NC_004718 | <i>Homo sapiens (SARS-CoV)</i>                                           |
| 2  | MLLLQVLFMLLQRYRYKPHSLSDGLLLALHFLFFRALPK   | KY417151  | <i>Rhinolophus sinicus</i>                                               |
| 7  | MLLLQVLFMLLQRYRYKPHSLSDGLLLALHFLFFRALPK   | OK017858  | <i>Rhinolophus sinicus</i>                                               |
| 1  | MLFLQVLFMLLQRYRYKPHSLSDGLLLALHFLFFKALPR   | ON378802  | <i>Rhinolophus ferrumequinum</i>                                         |
| 1  | MLFLQVLFMLLQRYRYKPHSLSDGLLLALHFLFFKALPR   | KY938558  | <i>Rhinolophus ferrumequinum</i>                                         |
| 1  | MLLLQVLFMLLQRYRYKPHSLSDGLLLALHFLFFKALPK   | KJ473815  | <i>Rhinolophus sinicus</i>                                               |
| 21 | MLLLQVLFMLLQRYRYKPHSLSDGLLLALHFLFFKALPK   | KY417149  | <i>R. sinicus, R. affinis, R. ferrumequinum, Aselliscus stoliczkanus</i> |
| 1  | MLFLQVLFMLLQRYRYKPHSLSDGLLLVLFHLLFFKALPK  | JX993988  | <i>Chaerephon plicata</i>                                                |
| 20 | MLFLQVLFMLLQRYRYKPHSLSDGLLLALHFLFFKALPK   | KP886808  | <i>Rhinolophus ferrumequinum, R. sinicus</i>                             |
| 1  | MFLQVLFILQRPSPLYRPLYLSDGLLLALHFLFFKALRN   | NC_014470 | <i>Rhinolophus blasii</i>                                                |
| 1  | MFLQILFMLQLPSLYKPLYLSDGLLLALHCLWFFKTLOK   | MZ190137  | <i>Rhinolophus ferrumequinum</i>                                         |
| 1  | MLFLQILFMLRLPSLYKPLCLSDGLLLALHCLLFFKMLQK  | KY352407  | <i>Rhinolophus sp.</i>                                                   |
| 2  | MLFLQILFMLRLPSLYKPLCLSDGLLLALHCLLFFKTLOK  | MT726045  | <i>Rhinolophus sp.</i>                                                   |

(B)

|   |                              |          |                                 |
|---|------------------------------|----------|---------------------------------|
| 1 | MLLPLVLSKLPQPPYLYRPLCCLLVGSL | MW719567 | <i>Rhinolophus hipposideros</i> |
| 1 | MYHLLVQYMPKPTFFHYRHHCRLAGLL  | MZ190138 | <i>Rhinolophus hipposideros</i> |
