# Supplementary material for: The SARS-CoV-2 protein ORF3c is a mitochondrial modulator of innate immunity
Source: bioRxiv or medRxiv preprint supplement (doi:10.1101/2022.11.15.516323), 2022-11-18

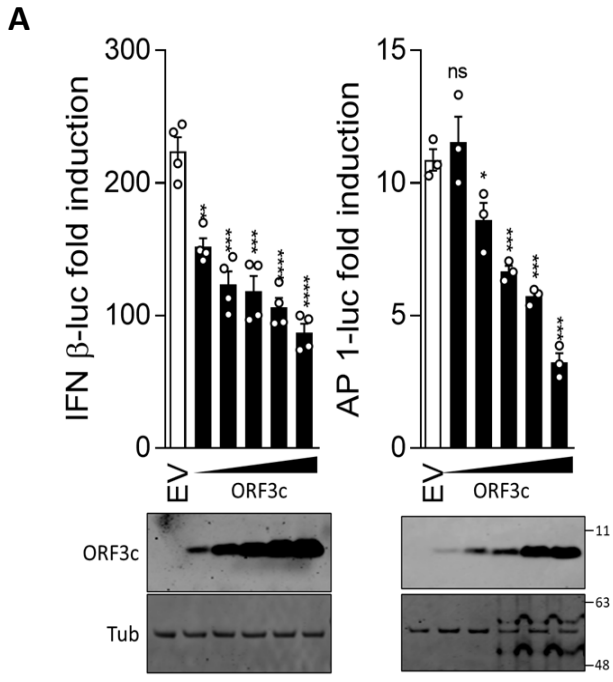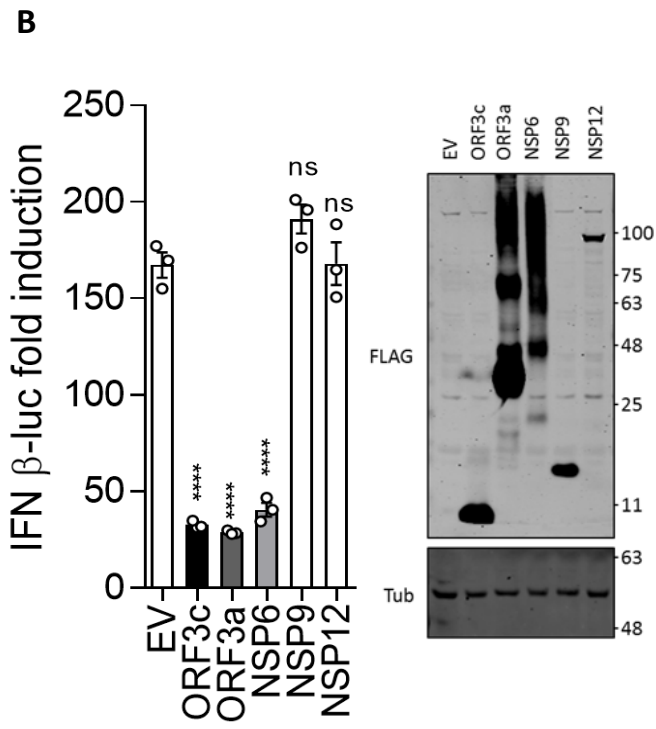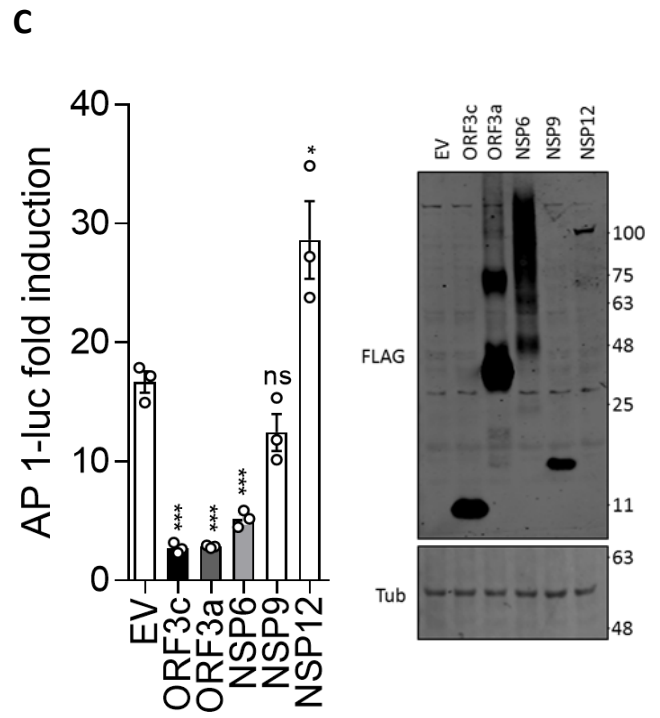

Supplement: Supplementary file [file media-4.pdf]
