# Supplementary material for: The SARS-CoV-2 protein ORF3c is a mitochondrial modulator of innate immunity
Source: bioRxiv or medRxiv preprint supplement (doi:10.1101/2022.11.15.516323), 2022-11-18
Supplement: Supplementary file [file media-6.pdf]

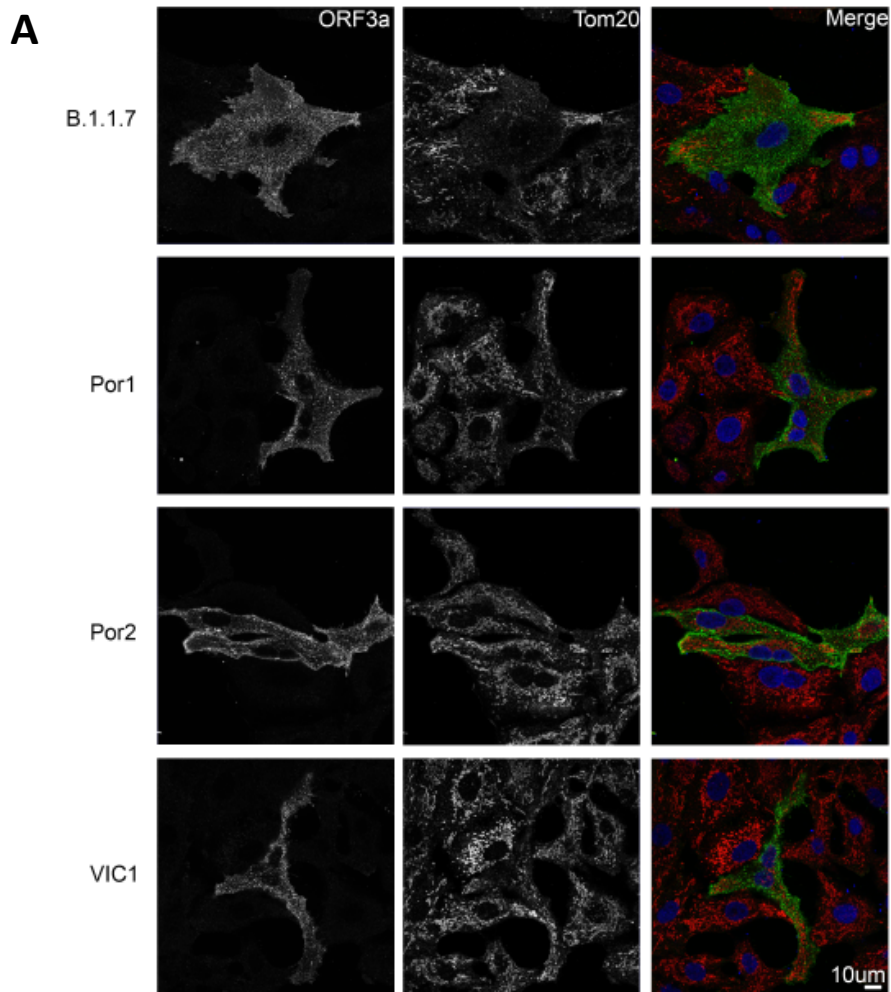

**B**

|         |                                                                      |           |
|---------|----------------------------------------------------------------------|-----------|
| 7685950 | MLLLQILFALLQRYRYKPHSLSDGLLLALHFLLFFRALPKS                            | WT        |
| 4179745 | MLLL                                                                 | PTC       |
| 481382  | MLLLQILFALLQRYRYKPHSLSDGLLLALHFLLFFI <sup>I</sup> ALPKS              | R36I      |
| 57355   | MLLLQILFALLQRYRYKPHS <sup>F</sup> SDGLLLALHFLLFFI <sup>I</sup> ALPKS | L21F/R36I |
| 34046   | MLLLQILFALLQRYRYKPHSL <sup>L</sup> DGLLLALHFLLFFRALPKS               | S22L      |
| 30815   | MLLL <sup>Y</sup> ILFALLQRYRYKPHSLSDGLLLALHFLLFFRALPKS               | Q5Y       |
| 15368   | MLLLQILFALLQRYRY <sup>E</sup> PHSLSDGLLLALHFLLFFRALPKS               | K17E      |
